# Supplementary material for: Bismuth halide perovskite derivatives for direct X-ray detection
Source: Royal Society of Chemistry journal article supplement (doi:10.1039/c9tc06313g), 2019-12-19
Supplement: c9tc06313g1.pdf [file c9tc06313g1.pdf]

## Supplementary Information for

### **Bismuth halide perovskite derivatives for direct X-ray detection**

Li Yao,<sup>a</sup> Guangda Niu,<sup>a</sup> Lixiao Yin,<sup>a</sup> Xinyuan Du,<sup>a</sup> Yongchao Lin,<sup>b</sup> Xingyuan Den,

<sup>b</sup> Jiangwei Zhang, <sup>\*c</sup> Jiang Tang<sup>\*a,b</sup>

<sup>a</sup> Wuhan National Laboratory for Optoelectronics, Huazhong University of Science and Technology, Wuhan 430074, China

<sup>b</sup> School of Optical and Electronic Information, Huazhong University of Science and Technology, Wuhan 430074, China

<sup>c</sup> State Key Laboratory of Catalysis, Dalian Institute of Chemical Physics, Chinese Academy of Sciences (CAS), Dalian 116023, China

Corresponding authors: [jwzhang@dicp.ac.cn](mailto:jwzhang@dicp.ac.cn), [jtang@mail.hust.edu.cn](mailto:jtang@mail.hust.edu.cn).

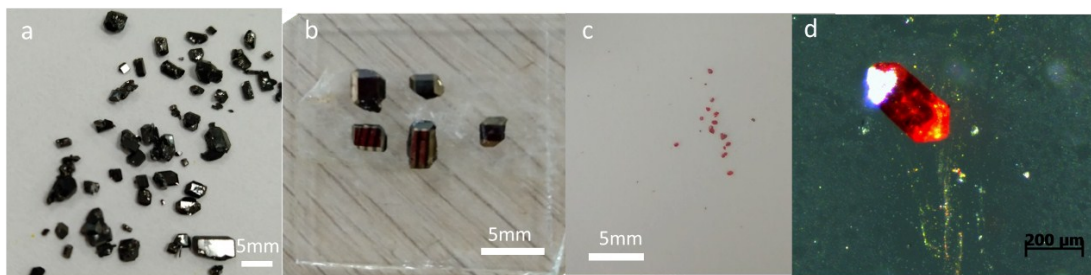

Figure S1 (a) The photo of as-grown black single crystals ((DMEDA)Bi<sub>5</sub>). (b) The photo of selected black single crystals (the yellow stripes on the surface of the black single crystals are Au electrodes used for different tried device structures). (c) The photo of as-grown red single crystals ((DMEDA)<sub>1.5</sub>Bi<sub>6</sub>). (d) The embodiment microscope picture of one selected red single crystal with relatively regular shape. The scale sizes are provided in the corresponding pictures.

Table S1 Bond lengths for (DMEDA)Bi<sub>5</sub> and (DMEDA)<sub>1.5</sub>Bi<sub>6</sub>

| (DMEDA)Bi <sub>5</sub>                               |                     |            | (DMEDA) <sub>1.5</sub> Bi <sub>6</sub>                                                |                    |            |
|------------------------------------------------------|---------------------|------------|---------------------------------------------------------------------------------------|--------------------|------------|
| Atom                                                 | Atom                | Length (Å) | Atom                                                                                  | Atom               | Length (Å) |
| Bi(01)                                               | I(002)              | 2.9984(14) | Bi(1)                                                                                 | I(2) <sup>1</sup>  | 2.9770(7)  |
| Bi(01)                                               | I(003)              | 3.1589(13) | Bi(1)                                                                                 | I(2) <sup>2</sup>  | 2.9770(7)  |
| Bi(01)                                               | I(004)              | 2.9430(9)  | Bi(1)                                                                                 | I(2)               | 2.9770(7)  |
| Bi(01)                                               | I(004) <sup>1</sup> | 2.9430(9)  | Bi(1)                                                                                 | I(1) <sup>2</sup>  | 3.1988(7)  |
| Bi(01)                                               | I(005)              | 3.2106(6)  | Bi(1)                                                                                 | I(1)               | 3.1987(7)  |
| Bi(01)                                               | I(005) <sup>2</sup> | 3.2106(6)  | Bi(1)                                                                                 | I(1) <sup>1</sup>  | 3.1988(7)  |
| N(1)                                                 | C(3)                | 1.505(19)  | N(1)                                                                                  | C(2)               | 1.457(19)  |
| N(1)                                                 | C(4)                | 1.52(2)    | N(1)                                                                                  | C(1A)              | 1.60(3)    |
| N(2)                                                 | C(5)                | 1.548(19)  | C(1A)                                                                                 | C(1A) <sup>3</sup> | 1.517(19)  |
| N(2)                                                 | C(11)               | 1.50(2)    |                                                                                       |                    |            |
| C(3)                                                 | C(5)                | 1.50(2)    |                                                                                       |                    |            |
| <sup>1</sup> +X,1/2-Y,+Z; <sup>2</sup> 1-X,1/2+Y,1-Z |                     |            | <sup>1</sup> 1+Y-X,1-X,+Z; <sup>2</sup> 1-Y,+X-Y,+Z; <sup>3</sup> 4/3-X,2/3-X+Y,7/6-Z |                    |            |

Table S2 Bond Angles for (DMEDA)BiI<sub>5</sub> and (DMEDA)<sub>1.5</sub>BiI<sub>6</sub>

| (DMEDA) BiI <sub>5</sub>                                                       |        |                     |            | (DMEDA) <sub>1.5</sub> BiI <sub>6</sub>                                               |       |                   |           |
|--------------------------------------------------------------------------------|--------|---------------------|------------|---------------------------------------------------------------------------------------|-------|-------------------|-----------|
| Atom                                                                           | Atom   | Atom                | Angle (°)  | Atom                                                                                  | Atom  | Atom              | Angle (°) |
| I(002)                                                                         | Bi(01) | I(003)              | 175.52(4)  | I(2) <sup>1</sup>                                                                     | Bi(1) | I(2) <sup>2</sup> | 95.31(2)  |
| I(002)                                                                         | Bi(01) | I(005) <sup>1</sup> | 89.44(3)   | I(2) <sup>1</sup>                                                                     | Bi(1) | I(2)              | 95.31(2)  |
| I(002)                                                                         | Bi(01) | I(005)              | 89.44(3)   | I(2) <sup>2</sup>                                                                     | Bi(1) | I(2)              | 95.31(2)  |
| I(003)                                                                         | Bi(01) | I(005) <sup>1</sup> | 87.20(3)   | I(2)                                                                                  | Bi(1) | I(1)              | 86.82(2)  |
| I(003)                                                                         | Bi(01) | I(005)              | 87.20(3)   | I(2) <sup>1</sup>                                                                     | Bi(1) | I(1)              | 174.57(3) |
| I(004) <sup>2</sup>                                                            | Bi(01) | I(002)              | 92.46(3)   | I(2) <sup>2</sup>                                                                     | Bi(1) | I(1) <sup>1</sup> | 174.57(3) |
| I(004)                                                                         | Bi(01) | I(002)              | 92.46(3)   | I(2) <sup>1</sup>                                                                     | Bi(1) | I(1) <sup>2</sup> | 89.45(2)  |
| I(004)                                                                         | Bi(01) | I(003)              | 90.61(3)   | I(2) <sup>2</sup>                                                                     | Bi(1) | I(1)              | 89.45(2)  |
| I(004) <sup>2</sup>                                                            | Bi(01) | I(003)              | 90.61(3)   | I(2)                                                                                  | Bi(1) | I(1) <sup>2</sup> | 174.57(3) |
| I(004) <sup>2</sup>                                                            | Bi(01) | I(004)              | 93.71(4)   | I(2)                                                                                  | Bi(1) | I(1) <sup>1</sup> | 89.45(2)  |
| I(004) <sup>2</sup>                                                            | Bi(01) | I(005) <sup>1</sup> | 174.18(3)  | I(2) <sup>1</sup>                                                                     | Bi(1) | I(1) <sup>1</sup> | 86.82(2)  |
| I(004) <sup>2</sup>                                                            | Bi(01) | I(005)              | 91.70(2)   | I(2) <sup>2</sup>                                                                     | Bi(1) | I(1) <sup>2</sup> | 86.82(2)  |
| I(004)                                                                         | Bi(01) | I(005) <sup>1</sup> | 91.70(2)   | I(1) <sup>2</sup>                                                                     | Bi(1) | I(1) <sup>1</sup> | 88.21(2)  |
| I(004)                                                                         | Bi(01) | I(005)              | 174.18(3)  | I(1) <sup>2</sup>                                                                     | Bi(1) | I(1)              | 88.21(2)  |
| I(005)                                                                         | Bi(01) | I(005) <sup>1</sup> | 82.814(19) | I(1)                                                                                  | Bi(1) | I(1) <sup>1</sup> | 88.21(2)  |
| Bi(01)                                                                         | I(005) | Bi(01) <sup>3</sup> | 180.0      | C(2)                                                                                  | N(1)  | C(1A)             | 123.7(13) |
| C(3)                                                                           | N(1)   | C(4)                | 112(2)     | C(1A) <sup>3</sup>                                                                    | C(1A) | N(1)              | 99(2)     |
| C(5)                                                                           | N(2)   | C(11)               | 111.8(19)  |                                                                                       |       |                   |           |
| N(1)                                                                           | C(3)   | C(5)                | 115(2)     |                                                                                       |       |                   |           |
| N(2)                                                                           | C(5)   | C(3)                | 111.9(19)  |                                                                                       |       |                   |           |
| <sup>1</sup> 1-X,1/2+Y,1-Z; <sup>2</sup> 1-X,1/2-Y,+Z; <sup>3</sup> 1-X,-Y,1-Z |        |                     |            | <sup>1</sup> 1+Y-X,1-X,+Z; <sup>2</sup> 1-Y,+X-Y,+Z; <sup>3</sup> 4/3-X,2/3-X+Y,7/6-Z |       |                   |           |
